# Supplementary material for: Sex-Specific Effects of Testosterone on the Sexually Dimorphic Transcriptome and Epigenome of Embryonic Neural Stem/Progenitor Cells
Source: PubMed Central journal article supplement (PMC5109279; doi:10.1038/srep36916), 2016-11-15
Supplement: srep36916-s1.pdf [file srep36916-s1.pdf]

1 **Sex-Specific Effects of Testosterone on the Sexually Dimorphic Transcriptome and Epigenome of**  
2 **Embryonic Neural Stem/Progenitor Cells**

3  
4 Matthew S. Bramble<sup>1</sup>, Lara Roach<sup>1</sup>, Allen Lipson<sup>1</sup>, Neerja Vashist<sup>1</sup>, Ascia Eskin<sup>1</sup>, Tuck Ngun<sup>1</sup>, Jason E.  
5 Gosschalk<sup>1</sup>, Steven Klein<sup>1</sup>, Hayk Barseghyan<sup>1</sup>, Valerie A. Arboleda<sup>1,2</sup> and Eric Vilain<sup>1</sup>

6  
7 <sup>1</sup>Department of Human Genetics at the David Geffen School of Medicine, University of California Los  
8 Angeles, Los Angeles, CA. 90095

9 <sup>2</sup>Department of Pathology and Laboratory Medicine, at the David Geffen School of Medicine, University  
10 of California Los Angeles, Los Angeles, CA. 90095

11  
12 **(Supplemental Figure File)**  
13

14

15

16

17

18

19

Supplemental Table 1: Baseline Sex Differences and Post TP FPKM log<sub>2</sub> Expression Values

20

| Gene          | XX       | XY       | XX+TP | XY+TP    | Gene     | XX       | XY       | XX+TP | XY+TP     |
|---------------|----------|----------|-------|----------|----------|----------|----------|-------|-----------|
|               | Baseline | Baseline |       |          |          | Baseline | Baseline |       |           |
| 2700007P21Rik | 4.34     | 5.79     | 6.57  | 4.82 ¥   | Gsg1l    | 0.44     | -1.03    | -1.85 | -1.42 ¥   |
| 1700008F21Rik | -3.60    | 0.50     | -0.38 | -2.82    | Hist1h1c | 4.11     | 6.23     | 8.61  | 8.42 ¥    |
| AC103359.1    | -Inf     | -0.83    | 0.71  | -1.55 ¥  | Hlx      | 1.90     | 3.15     | 3.07  | 1.72 §    |
| Abcc4         | 2.23     | 4.14     | 3.30  | 2.06 §   | Hrk      | -1.84    | 0.43     | -0.02 | -1.65     |
| Adm           | 4.32     | 5.38     | 5.48  | 4.45 ¥   | Hsd17b1  | -1.40    | 1.36     | 2.32  | -1.07 ¥   |
| Adm2          | -1.44    | 3.29     | 2.35  | -2.13 §  | Il6ra    | -2.98    | -0.53    | -1.76 | -2.94     |
| Adora2a       | -1.83    | 0.44     | -0.82 | -2.49 §  | Jag1     | 3.59     | 4.74     | 4.96  | 3.83 ¥    |
| Afap1l2       | 1.75     | 3.40     | 4.25  | 2.96 ¥   | Kdm5d    | -Inf     | 2.95     | -Inf  | 3.30      |
| Agap2         | 4.34     | 3.43     | 2.92  | 3.82 ¥   | Klf4     | 2.09     | 4.00     | 4.21  | 2.13 ¥    |
| Agt           | 3.40     | 2.08     | 3.86  | 3.07     | Lars     | 4.80     | 5.91     | 6.42  | 5.11 ¥    |
| Al464131      | 3.36     | 2.32     | 3.03  | 2.66     | Ldhd     | 7.68     | 6.96     | 6.98  | 7.02      |
| Anxa6         | 3.97     | 4.93     | 4.04  | 4.61     | Lhfp12   | 1.80     | 3.92     | 4.12  | 3.13 ¥    |
| ApoE          | 9.30     | 8.18     | 9.52  | 9.89 §   | Mei4     | -3.63    | -1.03    | 0.21  | -2.48 ¥   |
| Atf4          | 7.06     | 8.02     | 8.60  | 7.42 ¥   | Mmd2     | 4.90     | 3.45     | 4.54  | 4.66 §    |
| Atf5          | 4.88     | 8.02     | 7.11  | 3.86 §   | Mmp28    | -2.52    | 1.22     | 0.23  | -2.78 §   |
| Atp2a3        | -3.43    | -0.19    | 0.45  | -3.01 ¥  | Mthfd2   | 5.19     | 6.36     | 6.90  | 5.40 ¥    |
| Atp2b4        | 2.01     | 0.36     | 0.74  | 1.23     | Myh8     | -1.08    | -3.02    | -2.08 | -2.16     |
| Barhl2        | -0.47    | 1.27     | -0.01 | 1.17     | Nars     | 6.29     | 7.42     | 7.66  | 6.42 ¥    |
| Bdnf          | -1.27    | 0.41     | 1.19  | -0.37 ¥  | Ndrp2    | 4.80     | 3.46     | 4.55  | 4.93 ¥    |
| Cadps         | 0.19     | 2.26     | 1.19  | 1.00     | Nr2f2    | 0.12     | -3.28    | -3.72 | -3.89 ¥   |
| Car3          | 6.80     | 5.65     | 5.69  | 6.42     | Nupr1    | 1.99     | 6.16     | 6.70  | 2.43 ¥    |
| Cd24a         | 5.65     | 6.57     | 6.40  | 6.00     | Odz4     | -1.84    | 1.54     | -0.29 | -1.19     |
| Cd36          | 2.49     | 0.52     | 1.39  | 0.71     | Pck2     | 3.89     | 5.40     | 6.49  | 4.01 ¥    |
| Cebpg         | 3.78     | 5.26     | 5.80  | 4.21 ¥   | Plekhh1  | 5.05     | 4.14     | 4.40  | 4.67      |
| Chac1         | 2.22     | 4.57     | 6.09  | 3.39 ¥   | Psph     | 5.05     | 6.37     | 7.10  | 5.34 ¥    |
| Col28a1       | -0.17    | 1.93     | 1.61  | 1.23 ¥   | Pygm     | 4.68     | 3.37     | 3.68  | 3.78      |
| Cox6a2        | 1.61     | 6.07     | 6.70  | 1.19 ¥ § | Rhbdd1   | 2.62     | 3.68     | 3.90  | 2.64 ¥    |
| Creb3l1       | 1.40     | 2.67     | 1.51  | -0.16 §  | Sars     | 6.75     | 7.93     | 8.96  | 7.32 ¥    |
| Cth           | 1.94     | 4.82     | 5.41  | 2.13 ¥   | Scrg1    | 5.12     | 3.61     | 4.60  | 4.07      |
| Cxadr         | 3.92     | 4.93     | 4.54  | 4.24     | Sema4a   | -1.03    | -2.86    | -3.21 | -1.72 ¥   |
| Cxcr4         | 2.31     | 3.86     | 3.69  | 1.73 §   | Sesn2    | 5.29     | 6.31     | 6.46  | 5.16 ¥ §  |
| Cyb5r1        | 3.28     | 7.03     | 6.17  | 3.30     | Slc16a14 | -1.87    | 0.02     | 0.07  | -2.31 ¥ § |
| Ddr2          | 1.85     | 3.78     | 3.82  | 1.84 ¥ § | Slc3a2   | 6.24     | 7.80     | 8.11  | 6.08 ¥ §  |
| Dll3          | 3.43     | 2.09     | 3.18  | 3.53 §   | Slc7a1   | 2.61     | 5.71     | 3.91  | 4.34      |
| Dlx2          | -1.76    | -0.07    | -1.83 | -0.61    | Slc7a11  | 2.61     | 3.71     | 3.91  | 2.27 ¥ §  |
| Eda           | 0.65     | 2.20     | 1.81  | 0.46 §   | Slc7a3   | 2.09     | 4.82     | 4.55  | 2.45      |
| Eif4ebp1      | 5.63     | 7.10     | 8.14  | 6.35 ¥   | Snhg12   | 5.12     | 6.87     | 6.95  | 5.25 ¥    |
| Ero1l         | 3.69     | 5.40     | 5.29  | 3.51 §   | Sostdc1  | -1.61    | 0.80     | -0.12 | -2.11 §   |
| Fads3         | 1.28     | 2.63     | 2.47  | 1.34     | Sv2a     | 3.32     | 2.24     | 2.39  | 2.32      |
| Fam13b        | 2.52     | 3.72     | 3.17  | 2.27 §   | Tgif1    | 3.01     | 4.20     | 4.38  | 3.17 ¥    |
| Fam129a       | -2.29    | 0.06     | -1.37 | -1.92    | Thrsp    | 5.25     | 4.00     | 4.33  | 4.43      |
| Fbln5         | -1.96    | 0.62     | 1.32  | -1.88 ¥  | Thy1     | 4.91     | 3.74     | 0.72  | 2.61 ¥    |
| Fbln7         | 1.25     | 3.51     | 2.93  | 0.67 §   | Tmem28   | -1.08    | 1.27     | -0.39 | -1.78 §   |
| Fgfr3         | 5.66     | 4.69     | 5.06  | 5.40     | Tnnt1    | 3.45     | 1.73     | 2.12  | 2.19      |
| Gas1          | 4.96     | 6.01     | 6.05  | 5.39 ¥   | Trib3    | 0.71     | 5.08     | 5.02  | 0.75      |
| Gbp2          | 0.36     | 2.76     | 1.78  | 0.40     | Ube2ql1  | 2.37     | 3.82     | 3.97  | 3.10 ¥    |
| Gbp3          | 2.81     | 4.38     | 3.49  | 2.33 §   | Ube1y1   | -Inf     | -0.44    | -Inf  | -0.86     |
| Glce          | 2.79     | 4.09     | 4.27  | 3.11 ¥   | Usp18    | -2.31    | 0.18     | -2.10 | -2.51 §   |
| Gpr17         | 4.12     | 2.52     | 3.80  | 3.74     | Uty      | -Inf     | 3.18     | -Inf  | 3.54      |
| Gpr37l1       | -1.96    | 1.38     | 2.35  | 2.51     | Vegfa    | 4.60     | 3.93     | 6.59  | 4.48      |
| Gpx3          | 3.46     | 2.34     | 2.41  | 2.51     | Wars     | -1.61    | 0.80     | -0.12 | -2.11 §   |
|               |          |          |       |          | Xist     | 6.97     | -4.49    | 5.67  | -9.97     |

¥- Genes that were completely masculinized on a XX background  
 §- Genes that were completely feminized on a XY background

Supplemental Table 1. The log<sub>2</sub> FPKM values for the 103 genes that were differentially expressed between XX and XY eNSCs (FDR =0.10) in addition to the log<sub>2</sub> FPKM values for these select genes after being exposed to testosterone propionate.

### Baseline Sex Differences qPCR validation

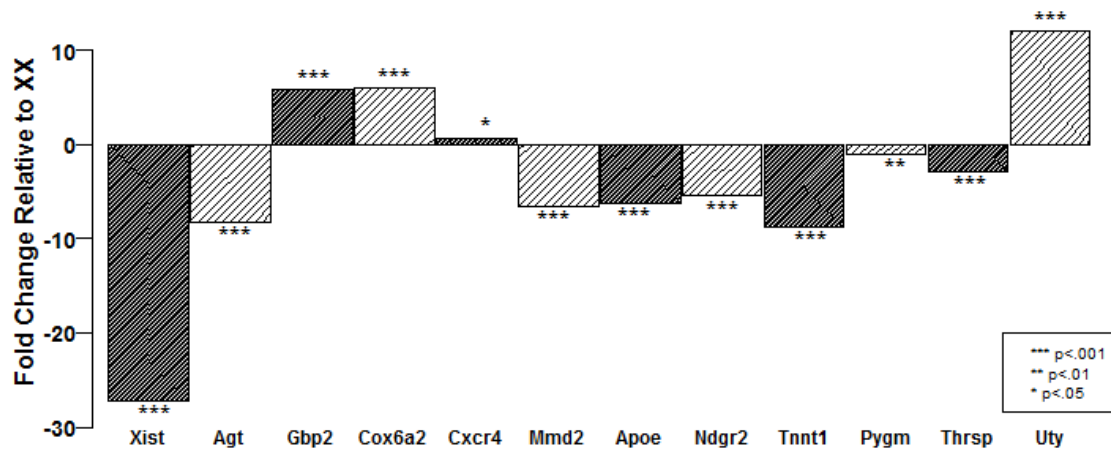

Supplemental Fig 1. qPCR validation of a select set of genes that were found to be differentially expressed between XX and XY neural stem cells within the RNA-seq dataset. Gene expression differences are represented as XY fold change from baseline XX expression.

21

22

23

24

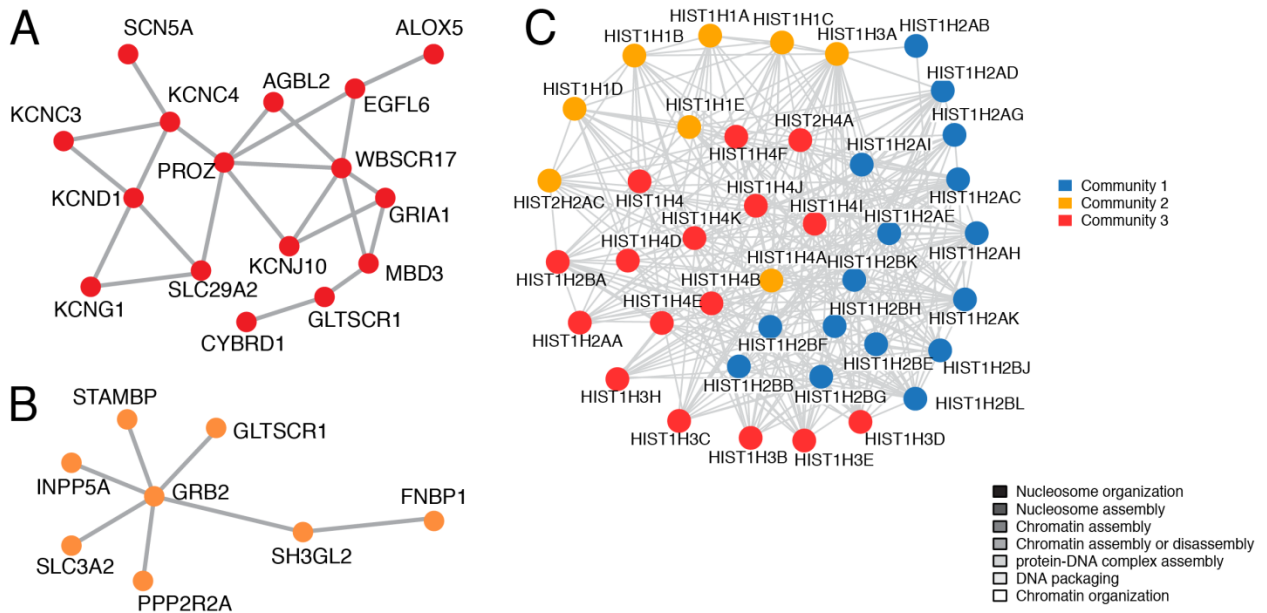

25

26

Supplemental Fig. 2: A) Down-regulated genes on an XX background in the presence of TP that are enriched in pathways dealing with potassium channel signaling. B) Down-regulated genes on an XY background that are enriched for pathways dealing with ERRB1 internalization. C) Up-regulated genes that are mutually shared between XX and XY in the presence of TP. The top three most up-regulated pathways are involved with nucleosome organization, nucleosome assembly, and chromatin assembly.

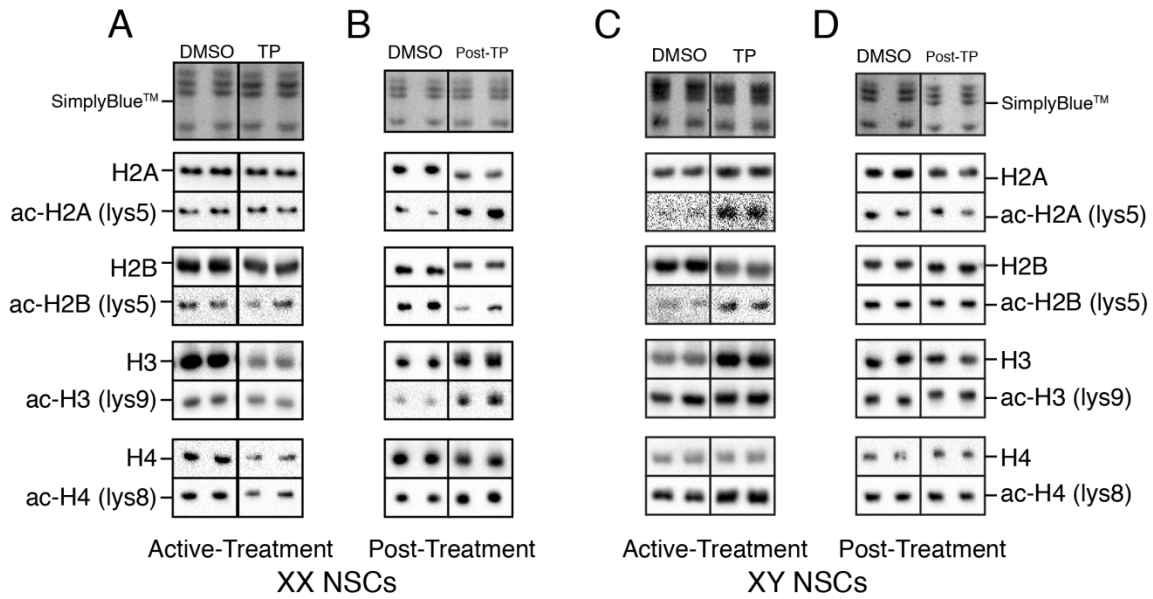

27 Supplemental Fig 3: A) Representative images of total protein assessment using Simply Blue stain which was  
 28 used as the initial standardization for protein loading. Representative Western blots for XX and XX in TP  
 29 measuring both core histone abundance and acetylation of specific residues. B) The same as panel A, except  
 30 XY and XY in TP is being assayed. C) Representative image of total protein assessment using Simply Blue stain  
 31 which was used as the initial standardization for protein loading. Representative Western blots for XX  
 32 daughter cells post DMOS exposure and XX daughter cells post-TP exposure measuring both core histone  
 abundance and acetylation of specific residues. D) The same as panel C, except measuring XY daughter cells  
 post DMSO exposure and XY daughter cells post-TP exposure.
